# Supplementary material for: N-6-methyladenosine (m6A) promotes the nuclear retention of mRNAs with intact 5′ splice site motifs
Source: PubMed Central journal article supplement (PMC11629677; doi:10.26508/lsa.202403142), 2024-12-03

# SourceDataF1

## B

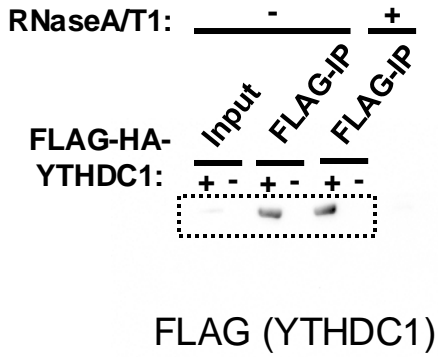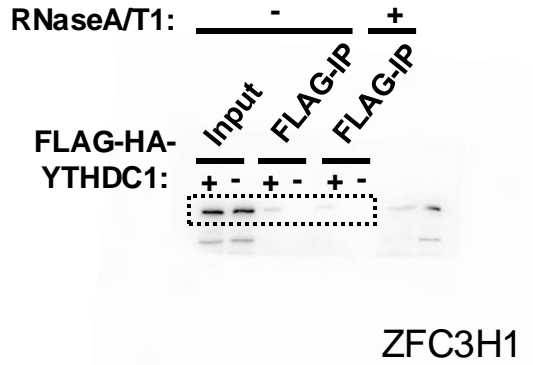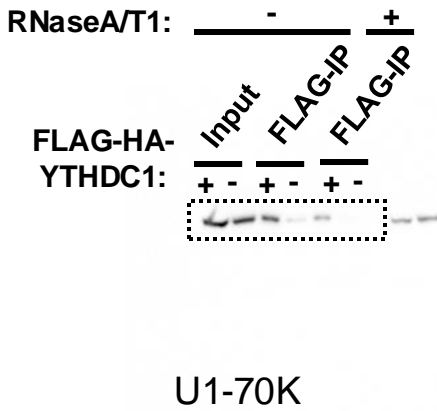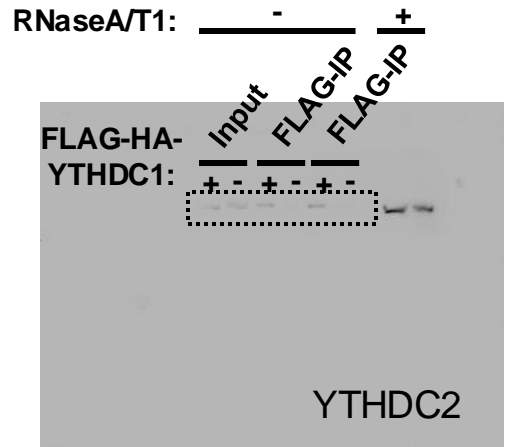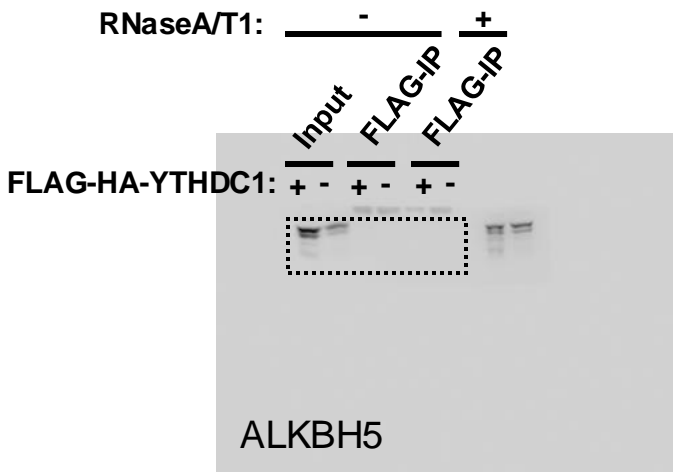

**C**

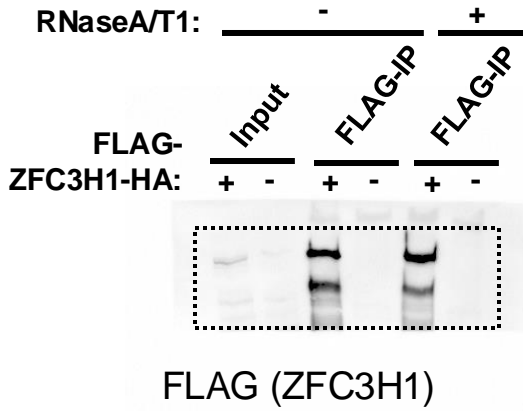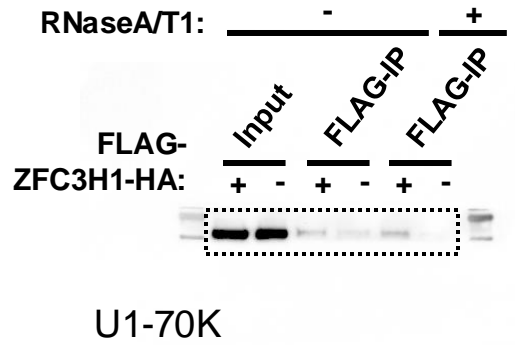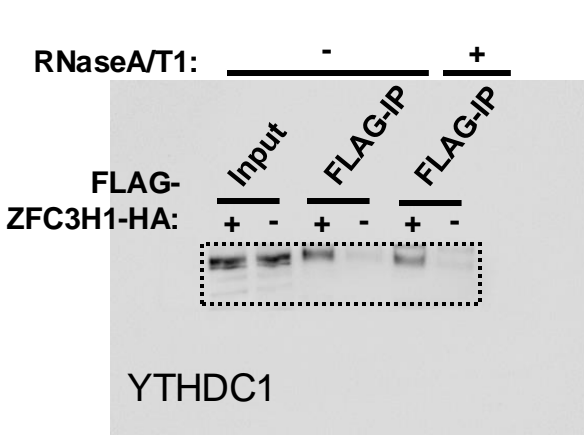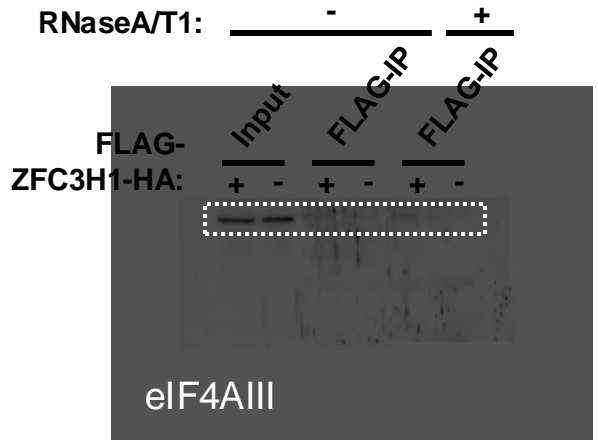

**D**

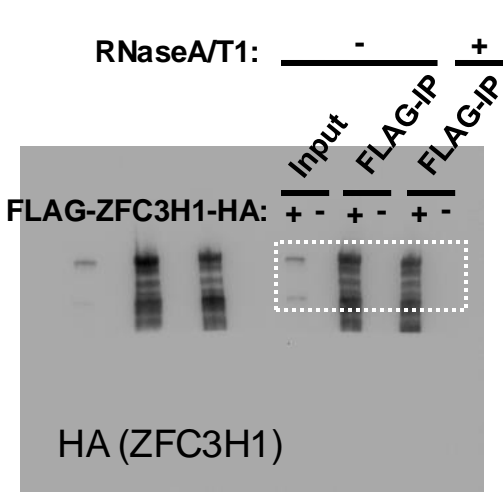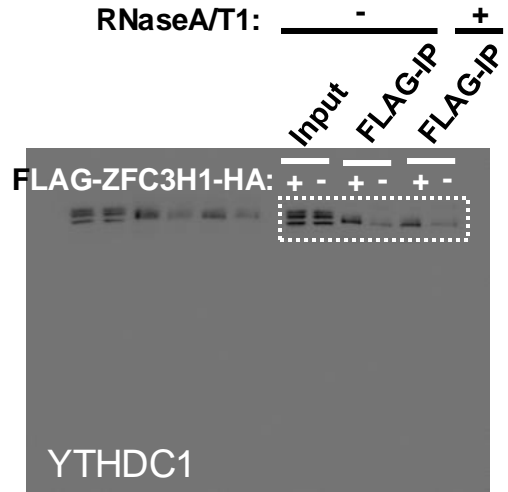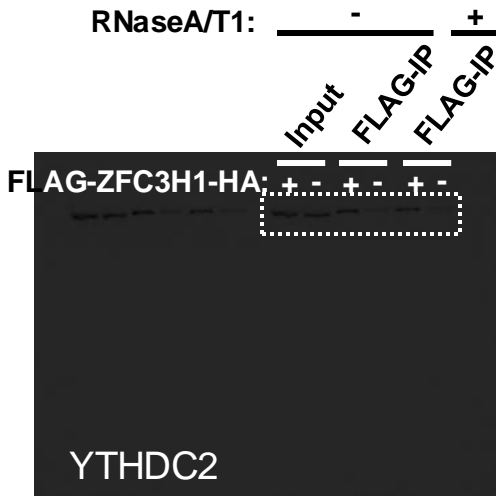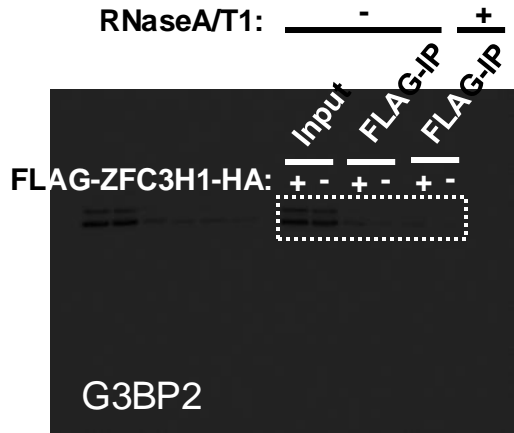

**E**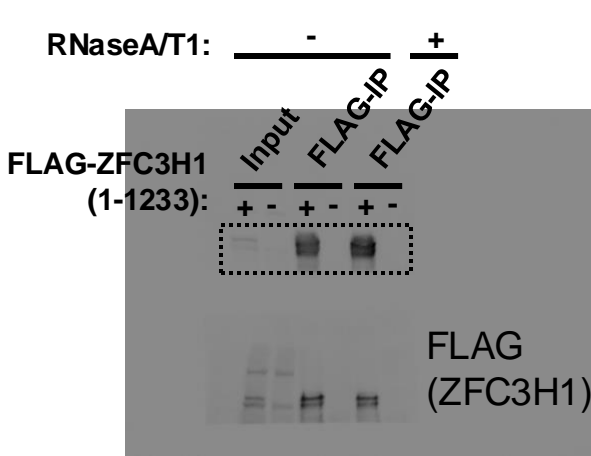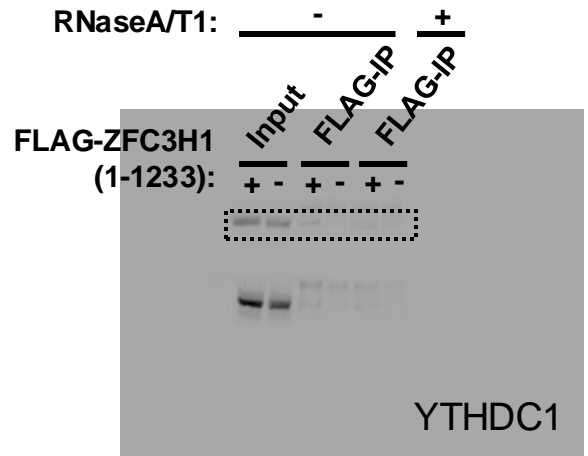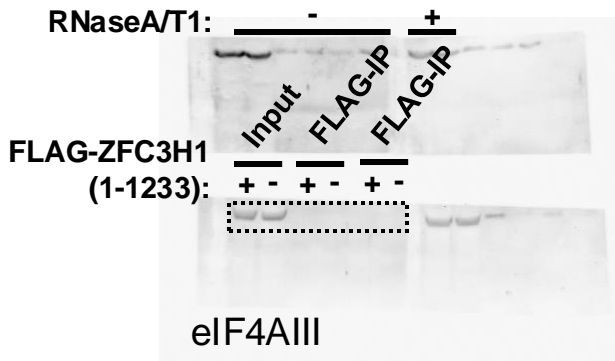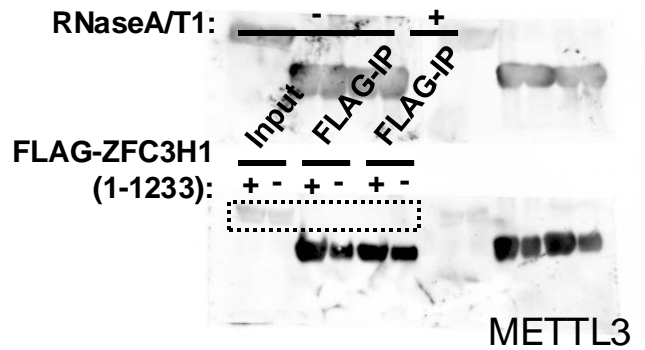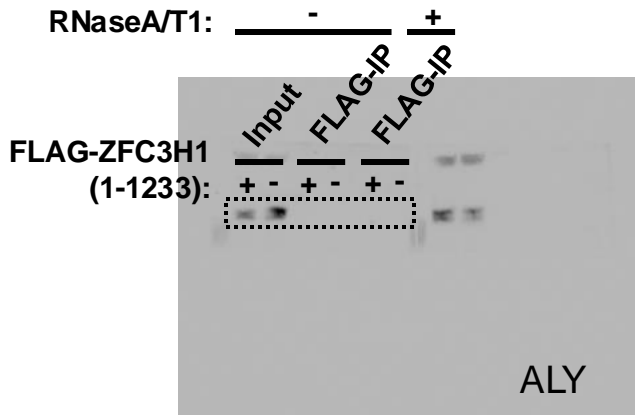

**F**

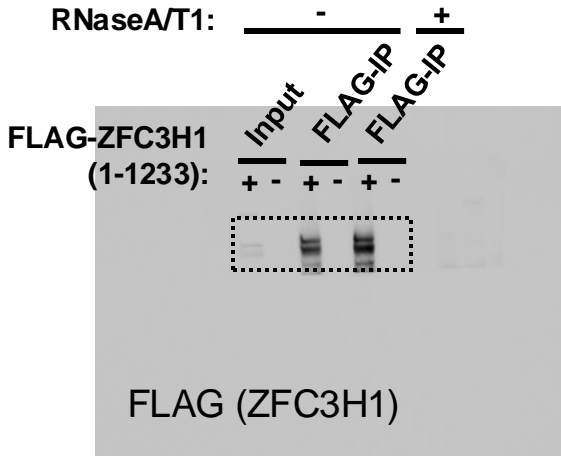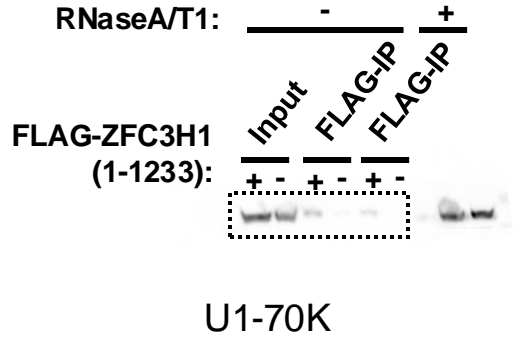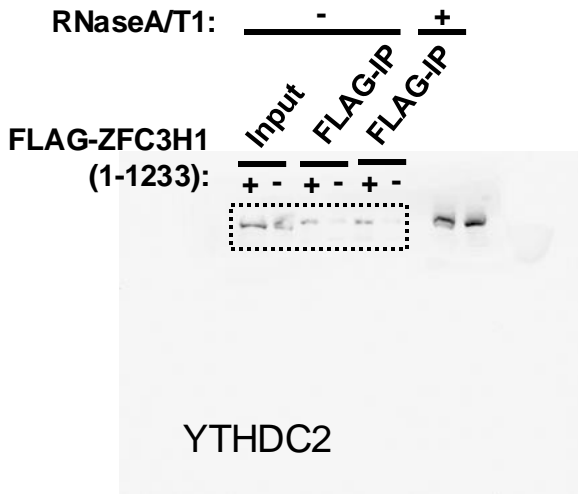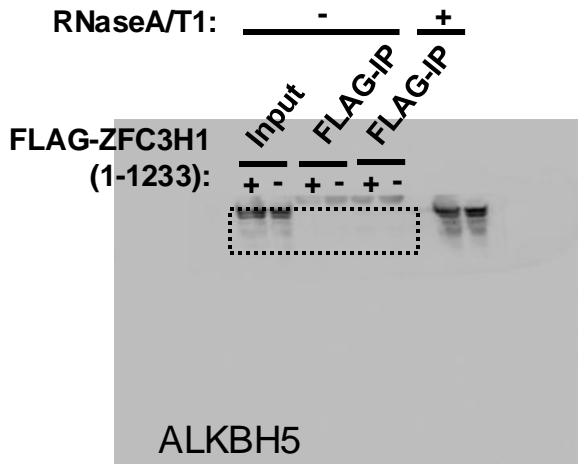

Supplement: LSA-2024-03142_SdataF1.pdf [file LSA-2024-03142_SdataF1.pdf]
