# Supplementary material for: N-6-methyladenosine (m6A) promotes the nuclear retention of mRNAs with intact 5′ splice site motifs
Source: PubMed Central journal article supplement (PMC11629677; doi:10.26508/lsa.202403142), 2024-12-03

SourceDataF3

**A**

YTHDC1

Control  
YTHDC1/2

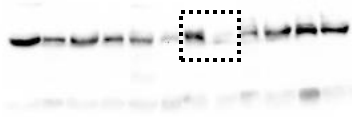

YTHDC2

Control  
YTHDC1/2

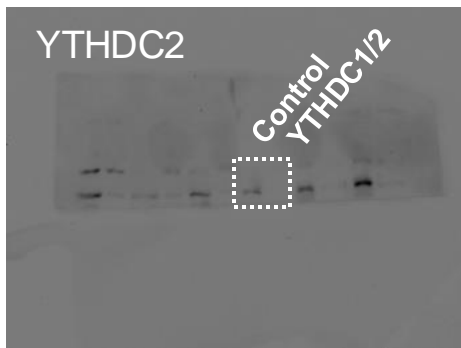

mAb414

Control  
YTHDC1/2

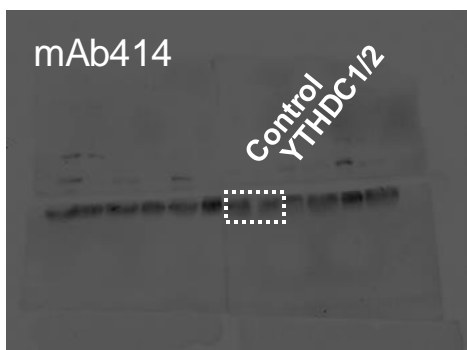

Control  
ALKBH5-1  
ALKBH5-2

YTHDC1

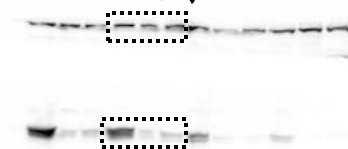

ALKBH5

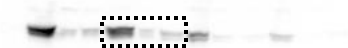

ZFC3H1

Control  
ZFC3H1-2

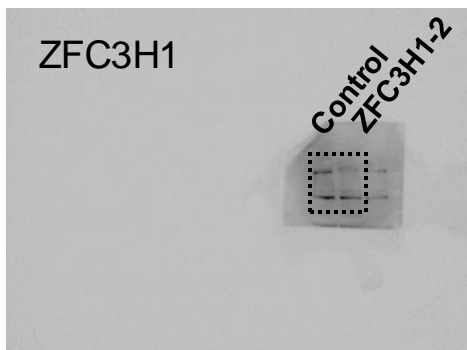

Tubulin

Control  
ZFC3H1-2

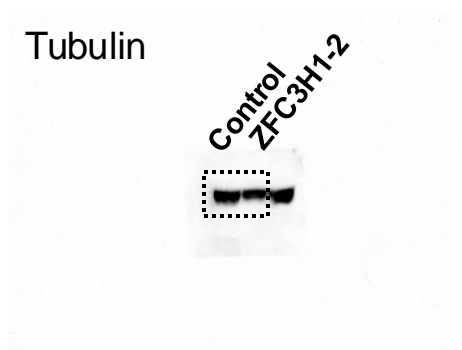

Supplement: LSA-2024-03142_SdataF3.pdf [file LSA-2024-03142_SdataF3.pdf]
