# Supplementary material for: N-6-methyladenosine (m6A) promotes the nuclear retention of mRNAs with intact 5′ splice site motifs
Source: PubMed Central journal article supplement (PMC11629677; doi:10.26508/lsa.202403142), 2024-12-03

**A**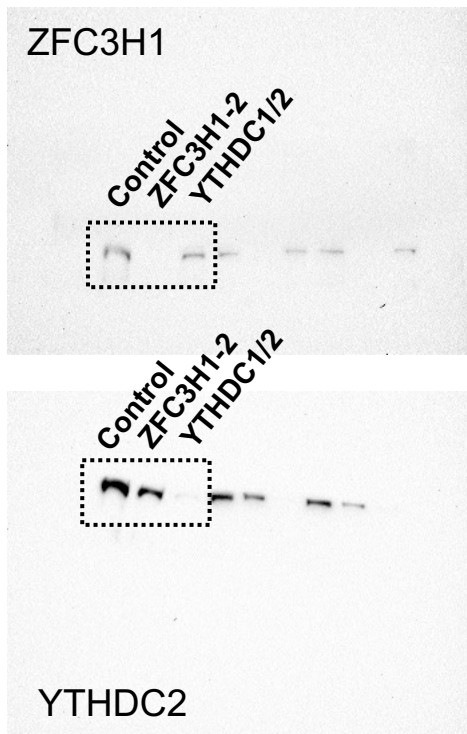

YTHDC1

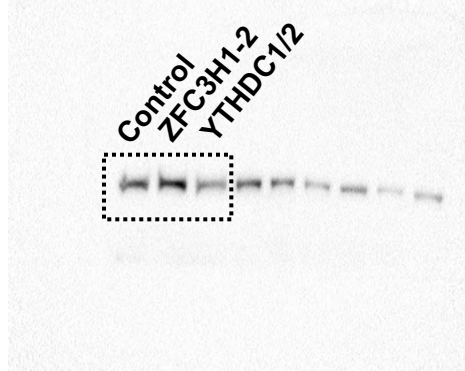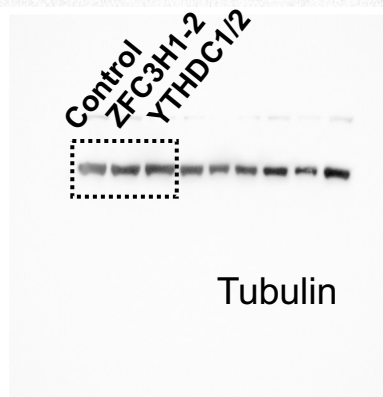**F**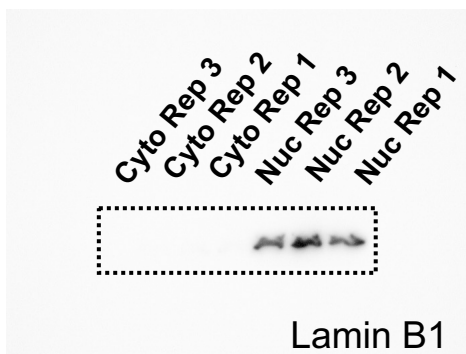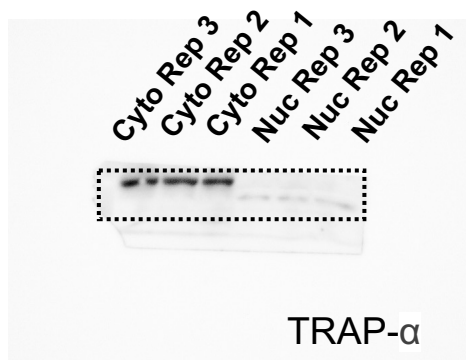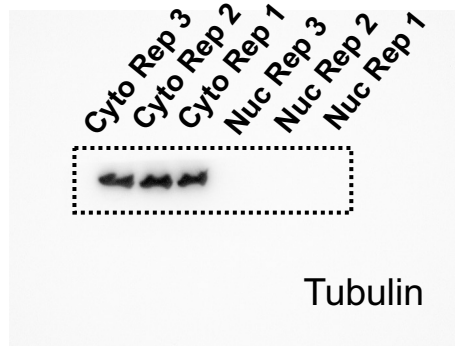

**G**

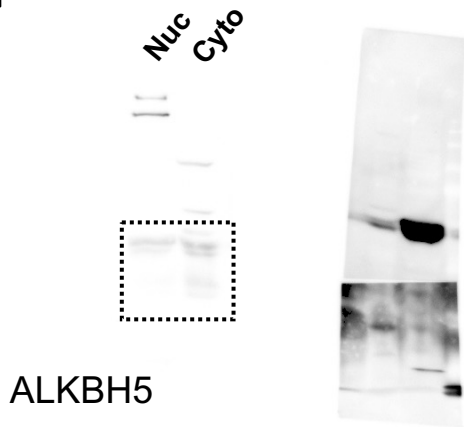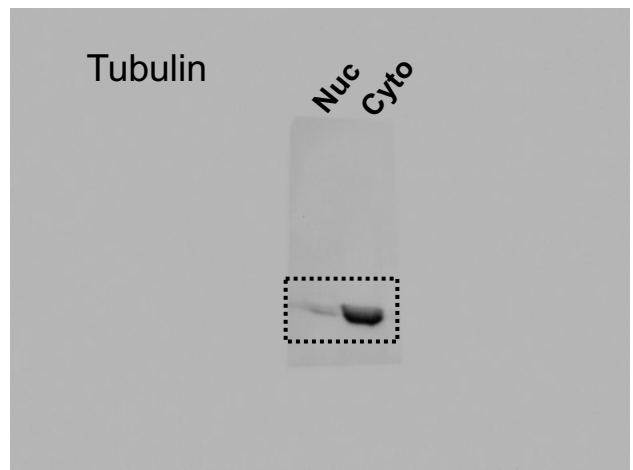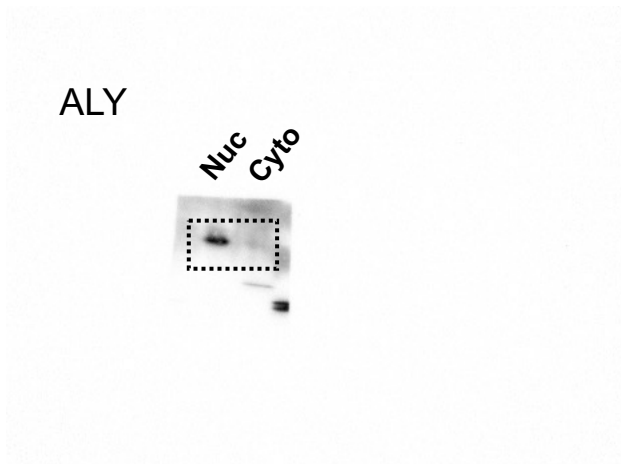

Supplement: LSA-2024-03142_SdataFS3.pdf [file LSA-2024-03142_SdataFS3.pdf]
